# Supplementary material for: PhMYB37 Promotes Shoot Branching in Petunia
Source: MDPI journal article supplement (doi:10.3390/genes13112064), 2022-11-08
Supplement: s1 [file s1]

**Table S2. Primer names and sequences used for polymerase chain reaction amplification.**

| <b>Primer name</b> | <b>Primer sequences (5'-3')</b> |
|--------------------|---------------------------------|
| MYB37-qRT-F        | GACTCTGCTGGGCTCAGTATT           |
| MYB37-qRT-R        | CATTAGCTCCTTTCTCAAACC           |
| GAPDH-F            | CAAGGCTGGAATTGCTTTGAG           |
| GAPDH-R            | CACCACTTTACTCCACTGATGCA         |
| MYB37-SL-F         | ATGGGAAGGACACCTTGTTGTGA         |
| MYB37-SL-R         | TCAGATAAAAGTGGATGGGAAAT         |
| MYB37-vigs-F       | CGGAATTCTCCATTATAGCATCTAAGCTACC |
| MYB37-vigs-R       | CGGGATCCATTAATACTGAGCCCAGCAGAGT |
| Tublin-F           | GAGCCTTACAACGCTACTCTGTCTGTC     |
| Tublin-R           | ACACCAGACATAGTAGCAGAAATCAAG     |
