# Supplementary material for: PhMYB37 Promotes Shoot Branching in Petunia
Source: MDPI journal article supplement (doi:10.3390/genes13112064), 2022-11-08
Supplement: s1 [file s1]

**Table S1. Protein information of PhMYB members.**

**PhMYB1**

MEIHSLEILETSNPVEGGSYGGDSGGEDEMLENESGSSENVVKKNKRTSGERVKGPWSPEEDAI  
LSKLVSNGFARNWSLIARGIPGRSGKSCRLRWCNQLDPSVKRKPFSDDEEDRLILQAHAIHGNK  
WASIAARLLPGRTDNAIKNHWNSTLRRRHNGKLRSDPSNVLEDVSAEKSASSEETQSCGDVNS  
LKAIEGKDVSSQENQEDNHHEDKSEA EVQRSDAANDPPTLV RPVARISAFSVYGS LDVPEAQIQ  
TPRLTPVQAPDLGISKLLEGCFDRLVPHQC GHGCCGNASQENNGSSLLGPEFVDYAEPPSFSS  
HELAALATEISNVAWCKSGLENSNIEVICNPPTTRATSGTSLLPNRPF

**PhMYB2**

MRKACCDNKEEMHRGAWSKQEDQKLIDYITKHGAGCWRNLPKAAGLLRCGKSCRLRWMN  
YLSPNLKRGNFSEDEEDLIKLHALLGNRWSLIAGRLPGRTDNEVKNYWN SHLRRKLIKMGIDP  
KNHRISHYLHRKRLEYWSENSSRGTDHEVVS DAGSSCAKHQPSSLPDLNSPPSIHSSCA

**PhMYB3**

MGRRPCCSKEGLNKGAWTPMEDKILIDYIKVHGEKGWRNLPKAGLKRCKGKSCRLRWLN  
RPDIKRGNITRDEEDLIIRLHKLLGNRWSLIAGRLPGRTDNEIKNYWNTNIGKKLQHQRAAAN  
SGHAKSRPPVTTQDIVGSGSSLSSASPCLVVRTKAMRCKTVFIPTPKNTSHDNSITTNCNDDDD  
DKVMAVETTALVASSSSFTLSSILSEQQPISGSSPVSLSGDQFMENSFNFMFNFDMDDPFLSELL  
NAAENTTTIGGDQVGDSFNRNEKERSYFPPSSQSALFSEETQHNDLELWINGFSS

**PhMYB4**

MGRSPCCEKAHTNKGAWTKEEDERLIAYIKAHGEGCWRSLPKAAGLLRCGKSCRLRWINYLR  
PDLKRGNFTEDEDELIKLHSLGKNKWSLIAGRLPGRTDNEIKNYWNTHIRKLLSRGIDPSTHR  
IMNEPSTQKVTTISFAAGNEDIKDQKISIKAEFEQIKDDEIISKPIKEQCPDLNLELKISPPYQQHSD  
RALQQSTTGSGGASTICFTCSLGLKNNKGCSCSRNRS MNVAGYDFLGLKTNGLDYRTLET RTK

**PhMYB5**

MGRAPCCAKEGLRKGPWSAKEDLLLTNYIKEHGEQWRSLPNKAGLLRCGKSCRLRWMNYL  
KPGIKRGNLSQDEEDLILRLHSLGKNRWSLIAGRLPGRTDNEIKNYWNTHLIKLLKSAGIEPKV  
NKSFSKYCSKKQATTDKPRKKQVKKKKNNKKIKDQPLVQDTSEPPQVVFIPKPIRISSGHSRNYSV  
DQNVALSTSSSNSADNNNNISNNEGKQAEVSFDPLFDEVVLDGCCELSPEWSLPTDDSMLEKV  
YEEYLQLISEECFLQLDDPLAENASHHPMLM

**PhMYB6**

MGRSPCCEKAHTNKGAWTKEEDQRLINYIRAHGEGLLRCGKSCRLRWINYLRPDLKRGNFTE  
EEDDLIKLHSLGKNKWSVIAGRLPGRTDNEIKNYWNTHIKRKLISHGIDPQTHRPLNAAANPA  
ATTTITTNTTKNICMDFRNNVDQKPHINIINKTNATDSSNNETKCSSVTTEETQPLELPKKNTQV  
MINLELSIGLPFHAKT DHIYSSNSAESTAPYNFLAAAAAPPPTVA AVPVVAMAE LVAETACLCW  
QIGFQGGQSCGKCKTTTG FYRFC

**PhMYB7**

MGRSPCCEKAHTNKGAWTKEEDQRLINYIRTHGEGCWRSLPKAAGLQRCGKSCRLRWINYLR  
PDLKRGNFTEEEDELIKLHSLGKNKWSVIAGRLPGRTDNEIKNYWNTHIKRKLISRGLDPQTH  
RPLNSTITTNTTSTKNICLDFRKN TSAATPLSQNDQKPMSSSISSLEDTKCNSSTTEEVQPLDSP  
AAPPVTGEV MINLELSIGLP IFQAKMTDQSSSISSNSAKEMGGKTVCLCWQVGSQNGQQFC

**PhMYB8**

MGRYPCKLDNDLKKGPWTAEEDEKLKEYIQGHGHGNWQLVPKRAGLNRCGKSCRLRWTN  
YLRPDIIRGGFSDDEEQMIINLHSV LGNKWSRIA AHLPGRTDNEIKNLWNTHLKKLLKAGIDP  
VTHQPINDPRLLLSLSNLMNPLESVLR LQAEVTEMAKIH LIQNI IQVLT PPLIPNLQENNFPMQ  
LYNLALYENIVTNVTHIDEPSISNSSDMLLSPSVVENNITGFSNVSNVNSEHSLPSLVEATPENSP  
SEQNDIIPNYFGS FSETKDFDAWEKSLDDEASNSFWQDIL

PhMYB9

MGRSAESDDMSGLKKGWPTPEEDQQLLDYIHKNHGHNWRALPKLAGLNRCGKSCRLRWTN  
YLRPDIKRGKFSEDEERLIKLHSL LGNKWSAIATRLPGRTDNEIKNYWNTHLRKKLLQM GIDP  
VTHRPRTDHINIFNALIGNIPPQLLAAASSNFMNTDNTSINNLTNLFSDTAQQLVHQIQLLQNS  
SSLVHSLFNNAATSTACPLNMEGLNQNFGLQNLCDQNQLQEYNSILMNYQQFLSNTSDSLTG  
FALNSSNSTDISATNGCDQLMVMSGTCSTSSSCGNNAASVTHANDDQMKNNISKAALHHDTP  
CPSSSNKMPQGNMISDIYPKQELVQPSSASMSTFEPWQGIMGDEEASDSYWRDIIE

PhMYB10

MGRYPCCCKDDEDLKKGPWAPDEDEKLMDYINKHGHNTNWQLLPKKAGLNRCGKSCRLRWSN  
YLRPDIKRGKFSIEEEEEMIINLHSL LGNKWSRIAAHLPGRTDNEIKNFYNTHLRKKLLRLGIDPRT  
HKPISDLNYLINLSQSFTSNNNNHLMNNPLASVLRQLAEVTEMAKIQQYLQGLFPPINTNIPF  
YSSNIQENFARYSSHLFPPLLEGHVTNVTNTQFLDSWLVDCAKSPNLDNSTSCISNSSQSYHQGEL  
NSKVDNFEGLNSSSKTYNDYSNLPVLAPSSPEAAH

PhMYB11

MSTSNASTSGVRKGAWTEEDLLLRECIEKYGEGKWHLPVVRAGLNRCRKSCRLRWLNLYLRP  
HIKRGDFSLDEVELILRLHKLLGNRWSLIAGRLPGRTANDVKNYWNTHLRKKNNKRARASKAM  
KITENNIIKPRPRTFSRPAMNHVSCWNGKSCNKNTIDKNEGDTEIHKFTDEKQKPEESIDDLQ  
WWANLLANNIEIKDLANGNSPTLLHEEIAPLVNIESNLMQEGESGLSDFSVDIDGIWDLLS

PhMYB12

MGRAPCCEKVGLKRGRWTAEEDEILTKYIHANGEGSWRSLPKNAGLLRCGKSCRLRWINYLK  
TDLKRGNITPEEEAIIKLRLATLGNRWSLIAEHLPGRTDNEIKNYWNSHL SRKVESLRIPSDERLP  
KAVVELAKKGTQQLNKQRRGRVSRSAMQKNRNNLSSTKGTSTASTLSKPQQPPKEINTISMPST  
PNIIKEVLSSTTTSSGQDASNTHLTSDNYASELDNEMLWHEELDPDFIFTCLWNEEGENLETVE  
NNNSHNSNTEILSVNVD MVSPGNSKINETSTLMEDGTSLDWDWQYLSEWNEIWAEQEENMS  
NNNISSRQLSNEALVEIDPVQQVDYNHSELVAWLLS

PhMYB13

MGRTPCCEKLGLNRGPWSKKEDDILINYIDKHGHPNWRQLPKLAGLLRCGKSCRLRWTNYLR  
PEIKRGNFTPEEEDTIIKLHQVLGNRWSVIAAKLPGRTDNEIKNIWHTRLKKKMNQSQIQEKP  
DIREQSETSKSEDSTNIQENTEISSPKPNSNNQHPSSSLRSSSITSSSEGSCSNTTTTSSHIDESRD  
QMNLNLLVEDDNFVSEVLWATPADDSKDNNDLFSLSSEVKNYELDSSLNDNWLWDDLFSR  
ANEFLLFPELV

PhMYB14

MQKLHNKNMGTNSKKGPWSPEEDQKLTSYIMKYRIWNWNQMPKFAGLSRTGKSCRLRWVN  
YLRPDLKRGPFMSMEEVETVIRMYQSLGNRWSAISKELPGRTDNEIKNFFHHLKQFGTKVND  
HVQVKRKATCKKSKKAKELEMRTGETQEKPNQSLDMSSSDITFDENHNWDFANFSETSSD  
NYCVNSLGAVPIIDSMVILESNPTTSEDPDFSVQDFRDETSINSSNVDFWLELYMAAENLAG

PhMYB15

MVRAPCCEKMGLKKGWPTPNEDQILISYIRKNHGHNWRALPKQAGLLRCGKSCRLRWTNYL  
RPDIKRGNFTKEEEDTIIQSHMLGNRLPGRTDNEIKNVWHTHLKRLKNYKPPHNTKRHIKN  
DDSKGPTTSESIKSDFNSTQKNINSPQHSSEISTVTAESVVMTQSQAINDHDQMMIKHEEME  
SSEYFPEIDESFWTDELSTDNNCNHVVTAVPFSSVREENVDMLTTRMEDDMDFWYNEFIKTD  
LQELPEF

PhMYB16

MGRSPCCDKVGLKKGWPTPEEDQKLLAYIEQHGHGSWRALPIKAASSSITYTAYGFDDLQFVG  
LQRCGKSCRLRWTNYLRPDIKRGKFTQQEEQTIIQLHALLGNRWSAIATHLFKRTDNEIKNYW  
NTHLKKRLTKMGIDPVTHKPMNDTLLSTNDNVQSKNSANLSHIAQWESARLEAEARLVKQSK  
FHSYKLDTPRTSTFFDHYSSQELLTPSSSSSHLKNLMPVTSGLQDFNFVERSTGFLLECTSADGNLS  
SGGMDSDSSGNASEQCEDNNYWN SILDLVNSSPTTESTMF

PhMYB17

MGRAPCCDKKGLKKGPWAPEEDEKLIEYIKNNGHNGWRSLPKLAGLLRCGKSCRLRWTNYL  
RPDIKRGPFSEEEELIQLHGILGNRWAAIAAQLPGRTDNEIKNLWNTHLKKRFLSMGIDPHIY  
EPSSAPSGLVRRPPASSSTRHMAQWESARLQAEARLSKDSHLSIPSLVGKSQSDYILRIWNSEIGE  
AFRNFKGVEKTTSESSSPKCGSTSSITTEMDITLTGSSVEGTNQHKDAEWKNCKLYTGNILRGSD  
TSSSNDFEESSESALQLLLDVPSKYDLSFLGQSDAYSMYPAFLSESLNCSSTEHEVCYV

PhMYB18

MGCKQMDKPKQKHKRGLWSPDEDQKLKDYILRHGHGCWSSVPINAGLQRNGKSCRLRWIN  
YLRPGLKRGTFSEIEEETVLT LHGVFGNKTDNEIKNHWHSYLKKRVIKKAENEGDARSGYSSPQI  
GNEESSHSSMKLASQNSSLDSEFHEICSLADTDQSSSLQVDFARENCKSNLPRVLFSEWLSFDQ  
LNGQDFKNSSNQESKNNFGYNNSVFQDSCMHGPLMNDINQALNRGMVDDMFQPTLEFEDH  
ISADGFEELISGEFNINGDMMYI

PhMYB19

MRCKPVESPCKKHKRGLWSPDEDHKLKNYILEHGHGCWSSVPINAGLQRNGKSCRLRWINYL  
RPGLKRGAFSIEEETIMTLHGMIGNKWSQMAQHLPGRTDNEIKNHWHSYLKKRVAKIAENE  
AKSQNMDGLSSSSKLTSRNSSLDSFAQIEGSLTDTQSSISQIEFLKEPRESNFQKVLFAEWFTLD  
QFKSQDFQNSGNSNHSRNNNFGYNKSDFDQDFIHLGFMSEGTYGADINIPGVLNNETVDDMF  
QASQKFEDHMSANGFEFISDEFNITEDVMI

PhMYB20

MDEIKKGAWSPPEEDQKLKAYIKKYGIWNWSQMPKFAGLSRTGKSCRLRWMNYLSPDVKRGPF  
SIDEVEIVIKTYQELGNRWSAIAARLPGRTDNEVKNFFHHTHLKKHMSLKNDDHALMKKKARSK  
RVMKKTRENEKTNTGKAQERPAVEVPTKIPMIGSSSNKNSPSPNSSSSQCNSIITCQENPTDQD  
CYNNISSSRVDQPVMNMESPFILSNPTESSSLGDTNCNQLIHQFDQYPHDSCTISDGSSFF  
DSFDQFDMIIISLFLTSLNFMVAGLSRTGKSCRLRWVNYLRPDIKRGPFSEEEVEIVMKMY  
QECGNRWSTIAANLPGRTDNEVKNFFHHTHLKMHLGVKNDVTVKTKGRSKRVKKTNKNEKKL  
ADNAQERSADVAPCSSVICEENHMMDMVDFSKTYQDCYNVSSLVDQSVINMENTVILESNP  
ETSETIDAANCQLHQFDYSHLCSSLFDDHFRFNSLDMNSFWSD

PhMYB21

MDKRTCNSQDVEVRKGPWTMEEDLILINYIANHGEVWNSLARSAGLKRTGKSCRLRWLN  
LRPDVRRGNITPEEQLLIMELHAKWGNRWSKIAKHLPGRTDNEIKNYWRTRIQQHIKQADQN  
MNKSSKCEQHNDQQAISTSQASTGPTDTIDSYSPPSYTGDTNNNMGNITFQGNFPTETNENIW  
SMEDLWSLQLLNDATN

PhMYB22

MGRSPCCEKLGLKKGPWTPEEDQKLMACIEKHGCGSWRALPAKAGLKRCGKSCRLRWINYL  
RPDIKRGKFSLQEEQTIIQLHALLGNRTDNEIKNYWNTHLRKRLTKMGIDPITHKPKTNIFGSSQ  
LSHMAQWENARLEAEARLVRESKKQISNNNIHDFGSLANTRLAHHQLFNQSRINNIVPLQA  
KVPPFLDVLKVWQDSNWTKPKITKDTSSSSVLDSVLTSMNNGSFDSPSTNNLFMAPNNNIPRL  
VDNSCLVNAGSFMENPEVEIITKEEVQTDQVQINDISSINYMSITDQSSGFPSFIQGFTHLENIVGS  
SEDNLEDNKYSYWNLTILNSCTSPAGSPVF

PhMYB23

MGRRPCCEKKGLKKGPWTPDEDDKLIEYINKNGHGSWRSLPKLAGLLRCGKSCRLRWTNYLR  
PDIKRGPFSEEEELIQLHGILGNRWAAIAAQLPGRTDNEIKNLWNTHLKKRLLSMGIDPQTH  
EPASAPNGLLRPPASLSARHMAQWESARLEAEARLSRESQLLVSPVGRSETDYFLRIWNSEIG  
DAFRKFKKGAKTACHSSASQASSCTKCGSASGIKTEVELRVAAGSPVTGSNQTEFAEWRNEQP  
HTEDILQGSdTSSSDAIEDSSSESALQLLLDFPSNNDMSFLGQSDSYSMYPFLTASSLICP

PhMYB24

MGRTPCCDKKGLKKGPWTPEEDEKLVEYIKKHGHTSWRSLPNLAGLDRCGKSCRLRWTNYLR  
PDIKRGPFSEEEELIQLHGILGNRWAAIASQLPGRTDNEIKNLWNTHLKKRLLSMGIDPQTH

QPSTAPNGLLRPPTSSSARHMAQWEKARLEAEARLSREPQLLVPSLVGKSETDYFLRIWNSGIG  
EAFRKLKKEEKTTCQSPASQESSSTKYGSDSGITTEIDLGLAGSPAAGSNQNETKWKNAQPYT  
ENFLQGSDTSSSSGLEDSSSALQLLDFPSPAERLCILTPLEV

PhMYB25

MGCKIVEKTKQKHKKGLWSPDEDDKLRNYIINHGHGCWSSVPINAGLQRNGKSCRLRWINYLR  
RPGCLKRGAFSLEEEDTILTLHAMFGNKWSQIAQHLPGRTDNEIKNHWHSYLKKRVAKNAENE  
SQTQSGNRESLLFSKKWTPQNSSLDSFEHIEGSLADSDQSGSQVDFPKEHQKSNLPKVLFAEWL  
CLDKFHGQDFQNSGTFDLTKNNFGYNNSESQHAFMHGLLMNEGSYGSCMNQEVNNGTVDD  
MFQPQLKFEDSMSANGFEDFMSGEFINTDVMYI

PhMYB26

MGHHSCCNKQKVKRGLWSPEEDEKLIKYITTYGHGCWSSVPKLAGLQRCGKSCRLRWINYLR  
PDLKRGSFSHQEAALIIELHSILGNRWAQIAKHLPGRTDNEVKNFVNSSIKKKLLSHGTLSDHL  
SMFTNFTNPNPSPSFDNFYTLINPNNPVNLLPAINSPILQVDMNNVNEDLNANSMAPSLIPF  
SFDSIPNDPSWFFNYPHSQHDLQDQNSNSIVSSNISLNYTDAAGGILMDSRNDPIKSSTHQD  
LLVVPNLLPRLSPPAPLQQNFDSMVVNTSTN

PhMYB27

MAQRKESLDRIKGPWSPEEDELQRLVDQHGPWNWSLISKSVPGRSGKSCRLRWCNQLSPQVE  
HRAFTPEEDETIIRAHAKFGNKWATIAARLLSGRTDNAIKNHWNSTLKRKCCSVSEDLSETPEQ  
PPLKRSSSVGPGPGPSSPSGSDLSDSLSCFPQPPLVYRPVARPGPIFPPPPPVQIPNPQKPDPKPD  
PVVQPDPTSLCLSLPGSENQAVQSPTTAQLPPVAPLPAQQGYEYGGATSATEKQFFTPEFLGVL  
QEMIRKEVRNYMSAGFVEKNGMCMMQTDAIRNAVVKRMGISKIE

PhMYB28

MAFQLTMQEEELRKGSWHEEEDERLASIVAILGERRWDALAKASGLRRSGKSCRLRWMNYLR  
PNLKHGYITADEEHLIVKLQKQLGNKWSKIAKQLPGRTDNEIKNHWRSHLRKKSLIYEQECCG  
SNTSKSGQISSASKSDSINTPNNSTGDSISGKDDCSSADSNETGLSDWIPSWSYEQSQMEHHMYL  
CRLNLCFCHPQCFSEDNNISTWGDTSSSIWEQ

PhMYB29

MGRKPCCSKVGMRKGAWTAEDRLLTNYIELNGEGNWRSLPMKAGLLRCGKSCRLRWVNYL  
RPGIKRGNFSPEEDDLIRLHTLLGGRWSLIAGRLSGRTDNEIKNYWNTYLLKKLKAAGIEPKAK  
TKKYSTNTRQNKEMKRRRAKNKTDNLLHQA EKPRGKKEDCEVVEKIQVHRPKAIRLTKGYSS  
TSSSFSSSSSQSSCQDNAPKFNFLPSSEEVDNKKEEKIEDNAIYEKLQLFDKLLNGCDISTECSEQT  
SSCCYMLDE

PhMYB30

MGRPPCCDKIGVKKGWPWTPEEDIILVSYIQEHGPGNWRAVPTNTGLLRCSKSCRLRWTNYLRP  
GIKRGNFSEHEEKMIHLQALLGNRWAAIASYLPQRTDNDIKNYWNTHLKKKLNKKMEGHD  
HENINEVGKSSSSSQSNVPKGQWERRLQTDIHMAKQALCEALSLDTPSNVDSPNNNNNPTPKI  
LPVDQQPVQTSTTYASSAENIAKLLNWMKNSPKSSESRSSTTQMSSLNLSIGAVSSSSPSEG  
TRNVLDVSFVSFNSSNSDVSQSMSIDEGGNFTPENNNATIFQVESKPINLPNFKEDNGIFQQVSK  
PNLETQQVPLTLLEKWLLDDANAQAAQEEFMGIGMGMTLGETADLF

PhMYB31

MGRPPCCDKIGVKKGWPWTPEEDIMLVSYVQEHGPGNWRAVPNSTGLRRCSKSCRLRWTNYLR  
PGIKRGSFTDQEEKMIIQLQALLGNKWAAIASYLPERTDNDIKNYWNTHLKKKLLKLEAASCG  
SDLYSKDSCLSSLSSTSKGQWERTLQADINTAKLALQNALSLKPSAIQEYMATDVKPKNICYPY  
IKQEGNNSTSTYASSAENIAKLLKQWTKSSSTNNSSENSKGSSSTQLSCNYYNATNDFESISNFES  
FEQSKSDQFSQATTPEESKFYGESKRELDQVPLSVMLENWLFDENEDLF

PhMYB32

MSITSETDDWMTSKVDMDSPDEANGGGNVGGSPLKKGPWTS AEDAILVEYVMKHGEGNW  
NAVQKHSGLARCGKSCRLRWANHLRPDLKKGAFTLEEERLIIELHAKMGNKWARMAAELPG

RTDNEIKNYWNTRIKRLQRAGLPVYPPDICFLASQNKQNEELAGLSSTDAQHPGLVATNNFDIP  
PVEFKNLELNQLLCPPAHVEIPASSLLDIPASGFLAQVHSAPYSSTSLSTVHPSKRIRGSESMFSG  
SNGDLFLASCQYQNGGSLIAQPLGFSSYNHNLTIDGQQSFSNVIPGSHAPLNGNSSTSEPTWAL  
KVELPSLQNQTANWDSPSSPLHSLESVDTLIQSPLAGHSESVLSPRNSGLLDVAVLYGSQTMNSS  
KDNSNQAKEETSADAVGNPCPDLEKGWETYGDPIPSRLPASVFTECTPTTGNSLHELQSTSR  
MPGENGCNVKQENADQAPSDGKDDMLNQTFASNCSSPKTQHTKNNLALKNAFGSGFFDDY  
GWDCKQVHSVATSSGQACGRDSAWDAMSAM

PhMYB33

MVAIKIRRDKDMMSSESDDMMTSKVGVDSPSVEEACGGGNTGGGLPLKKGPWTS AEDAILV  
DYVTKHGEGNWNNAVQKHSGLARCGKSCRLRWANHLRPDLKKGAFTPEEERRIIELHAKMGN  
KWARMAAELPGRDNEIKNYWNTRIKRRQRAGLPVYPPDICFQAISESKQNE DLGTFSTDGQY  
SDFLPVNNYEIPAVEFKKLEFNEPLCPPSLLDIPAGSLLDIPARSLLAQGLNSAYYSRSLSTMHPS  
KRIRGSESLFSALNGDSSPLKNEDSFPTCHQYQNDGTL LAQSLGFSSPYNQNPTSDHHPSSLGVP  
GSHAPLNGNSSSSEPSWAKKLELPSLQSQMASWGLPPSPLPSLESVD TMIQSPTEHTESC NLSP  
RNSGLLDVAVLYESQTM RASKDNLHQENSGDGADDSCPD LHETEW EAYGDPI SPLGHSAASEKF  
DGKDDTLNPFFSRPDYLL ESNCFS PMQS

PhMYB34

MGRSPCCEKAHTNKGAWTKEEDERLVAYIRAHGEGCWRS LPKAAGLLRCGKSCRLRWINYLR  
PDLKRGNFTEEEDELI IKLHSL LGNKWSLIAGRLPGRDNEIKNYWNTHIRRKLSRGIDPTTHR  
PINEOPTISTQKVTTISFAADNNKDDQDQKIINIKSEFETTSKLQDEIQERCPDLNLELRISPPHDH  
QQFNDQSIDELGRRNSLCFACSLGIQNSKDCSCNTNGNGCSSNVSMNIASYDFLGLKTNGLLD  
YRTLES

PhMYB35

MGRSPCCEKAHTNKGAWTKEEDERLIAYIRTHGEGCWRS LPKAAGLLRCGKSCRLRWINYLRP  
DLKRGNFTEEEDELI IKLHSL LGNKWSLIAGRLPGRDNEIKNYWNTHIRRKLSRGIDPTTHR  
AINESSTTTQKVTTISFGAGNKNKDIEDLKMINVKAESGLSQEDENSSSSQLFQEQC PDNLNLELR  
SPPYQQNQPDHQALKQSPTRGHLCFACSLGIQNSNDCNCSNGCSTNMGMNIASYDFLGLKA  
NGVLDYRTLETTK

PhMYB36

MNPRGEDFFGFQKHHITHSFYLYKQVFSSNIFQPTINHFKKIPFGSKLVEGKKILKMGRAPCCD  
KASVKKGPWSPEEDARLKAYIEEHGTGNNWIALPQKIGLKRCGKSCRLRWLN YLRPNIKHGGF  
TEEDNIIICSLYISIGSRWSIIAAQLPGRTDNDIKNYWNTRLKKLLGKRKQSQMNRLLLAGGQ  
DLKETNGLEENSL LQNLNSALERLQLHMQLSLQNLPLSFYNNPALWPKLTPLQQKMIQTLQA  
TGLSIENQSSLLAQISPSANQVDQLGQKVGINEFANTMSTRFKVNNEVEKSTVNNGISSDSPID  
FSNQKDVLDTNIGQENTGEIQGIQGFTQAEIDDLILINNKGLIADQFDCFKEMDGSSSRDNLAW  
WSNDFDNTTSSNSWGSSSNIVQQTEGMYQDYALGYNLQ

PhMYB37

MGRAPCCDKANVKRGPWSPEEDAKLKDFIHKYGTGGNWIALPQKAGLKRCGKSCRLRWLN  
YLRPNIKHGFDSDEEDRIICSLYSTIGSRWSIIAAQLPGRTDNDIKNYWNTKLKKKLMGLIPSSIIQ  
RKSPYMFPTTLHATQVQPNLYTPNLSYTNNNMNFPLGATNHQYSYNFQSHHQDSLINPMQ  
IYPQLKDNLLMFGGTTEASCSSSDGSCSLSFGHKEIKKEDIIMGNFSGHQISSVAFEENQNFM  
WVDQKPNGYFGNNNNQSADQVLLQYDLQDEVKQQQLTSCSNGNNGTTTSECNNNSMFY

PhMYB38

MGRAPCCDKANVKKGPWSPEEDAKLKEYIEKSGTGGNWIALPHKAGLRRCGKSCRLRWLN  
YLRPNIKHGFDSDEEDRVICTLYASIGSRWSIIAAQLPGRTDNDIKNYWNTKLKKKLMGLVSTSQK  
IRPLHNQHQTITNYNYPQIPFHQTSSLAASSPYSTTTIPCYESTIPTLASSSFLNTASASCTSGISGS  
TSGTVLQVQESYVGGPTTSSDGSYTNQMSQGRDQLEYDYGVSNGGENLDFHNYLYNNGIIGLE  
DQSTSSKFLNIEAADEKPIINANSYVQQEQNPLDYSLEEIKQLISTNNVTCNSNFFLDENKIEEK

VMMYY

PhMYB39

MGRAPCCDKNSVKKGPWSPEEDAKLKAYIEQHGTCGNWIALPQKIGLKRCGKSCRLRWLNYL  
RPNIKHGGFSEEDNIILSLYISIGSRTDNDIKNYWNTKLKKKLFQKQRKNLKGNNQKQGSRK  
REMSSSMVMVSNENIIANPSWPELPILQPIPYSNEEPRFNDHSSIRKLLMKLGGKFSDDDNDDEK  
PMNEPPSNPQYPMDNSLIQPIYDQDCINMMHSPFTNNTHYNMDAKALCWADTDTERRLGE  
RMGSDTPVVPTVNDGCFINELEHMMYTNPQKLSGLEMLYVDMMLNNKHATTLGGSLEDLM  
NNLVFPLPLDASNTEGHQHGTLQGGALNELRLQAMSHPPCVWLQQPGKWLSEAIMIRES  
RVEGLSLNGSK

PhMYB40

MGRQPCCDRVGLKRGPTIEEDHKLNVNLLNNGIQCWRTVPKLAGLQRCGKSCRLRWINYLR  
PDLKRGTLSEDEEDQIIQLHARLGNRWSKIASNFPGRTDNEIKNHNWNTRIKKRLKLMGIDPLTH  
KPLEPIDHKKYKHQPDDHRTLSRTENSNDNANNDPVPNDYNNMLCGNLEVELWNKSC  
KTMSSVTCYSSSTSLDADDSINLSTVSAATTESSSNLAPVEDQQDSIQQWMDSLFSCSVNQLEDD  
MFFLRKYN

PhMYB41

MGKQPCCDNVGHNRGPWTVEEDHKLNTFILNNGIQNWRHVPKLAGLVRCGKSCRLRWMN  
HLRPDLKKGAFTEDDEEYMLIKLQSQLGNRWSKIAAHFPGRTDNEIKNHNWNTRIKKKLYTEQTR  
DIKEGSTKQKYSQQSLPSLEYLVKDQQQLKEPIEISEMGSDNVNQNSEPVETISIE

PhMYB42

MGRKPCCDKVGVKKGPWTTEEDKKLISFLVTNNIGQCCWRSVPKLAGLRRCGKSCRLRWNTY  
LRPDLKRGLLTAEEENLVIDLHSLGNRWSKIAARLPGRTDNEIKNHNWNTHIKKKLLKMIDP  
VTHEPLNKEEKSRDQSTKTDDIDNKQNGHDDQQVHVLESTNVTAATSLLENSSLCSSSSFS  
PNENSSCITDESQMVLDTFSENNPLLSSMLHVDAPLIDFQWELSASGTTQKQNLNDNENFNWL  
DCQDFGIHDFDFDCFNMEMEYFLDSIGDIKNEK

PhMYB43

MGRQPCCDKVGLKKGPWTADEDKKLINFILSNGQCCWRAVPKLAVILDDGIGAGLLRCGKSC  
RLRWNTYLRPDLKRGLLSEYEEKMVIDLHAQLGNRWSKIAHLPGRTDNEIKNHNWNTHIKKK  
LKKMGIDPVTHKPLSTITNDHPNKQQPKDLPVIQQENLQEIIMPPSSVNDVSEMDIETPIEQSAIS  
EIKVEEDNNKNMETTSCKNNINISFDSTTVEVNNNGFCTDEVPLIEPHEILVPNSESTPSTSSSS  
LSTSSSSSSSILEDLKFPLPSFDEWPSDYNNMEQNNMGLGWENDFSSSTLDLFLNDDNDINQFPRD  
DESWKFDQLL

PhMYB44

MGRQPCCDKAGVKKGPWSAEEDKKLINFILNNGQCCWRALPRLAGLMRCGKSCRLRWNTY  
LRPDLKRGLLSGYEETMVIELHAQLGNRWSKIAHLPGRTDNEIKNHNWNTHIKKKLLKMIDP  
VTHKPITSDQPNIEQPTKDQPTSDQPTIEQPTKNQQEKQNIMPPSTVHVQEMDIDQNKELVE  
TPIQSTVTVTKLEEGTSPKNMEPIQVNNGFCTDEVPLIEPHEILVPSESTPSTSSSSSSPLEDMQFL  
PSFDNWQCDFNNMDNIGINWAHDFSSTLDYLLNDDNDMDKNISLQDWSQVLEV

PhMYB45

MRTSSSSSTTSNKVTPCCSKVGLKRGPTPEEDEILTNYINKEGEGRWRTLPPKAGLLRCGKSC  
RLRWMNYLRPSVKGRIAPDEEDLILRLHLLGNRWSLIAGRIPGRTDNEIKNYWNTHLSKKLI  
SHGIDPRTHKPLKNSNSSDDITNKLASSPSSSKANDLNPLSPTYISSFQMEEPGLKINTHPGE  
ITSLDDQYQSNAILAEYGDDLNIATIEEDVEMNCCTDDVFSSFLNSLINEDMFACQNQQTNGT  
FQDFDPFMASSTPSSDQYNPS

PhMYB46

MRKPEFSSSGKNGTNSNNNNINANMKLRKGLWSPEEDEKLMHYMLTNGQGCWSDVARNAG  
LQRCGKSCRLRWINYLRPDLKRGAFFSQEEELIHLHSLGNRWSQIAARMPGRTDNEIKNFW  
NSTLKKRLKNSSSCSTPSPNASDSSSEPCKDNLNMGINQGLIMSMQNHNLMSMFMDSTSSSSSS

MALNTIIEPLPMLEQTLINMPNGLSAPPYLTTQPCMTQGRSIVTNGSLFYGNNHGIFGGNLGME  
GELYIPPLESVSIHEYQNVENGNLVERSSQNNNNPTNSMTNLTSHFNSSSNNIKVENFGGVGNY  
WEGDELKVGWDLEELMKDVSPFPFLDFQVE

PhMYB47

MVRTPSIDKNGMKRGAWSEEDNKL RAYVERFGHPNWRKLPYAGLMRCGKSCRLRWMNN  
LRPGLKKGNYSHEEEQLIIKLHNQLGNRWSTIAAKLPGRSDNDIKNHWHAHLKKRTKTNANS  
STMEQMSTESSQSGCAEQSNSKLP ELENYCDPIDTSSPPEVSSSDLSKLFSSCSLLNGMDWIED  
DQIRSMEQLSNIDSVEPLLD SFSCWTKPIDNFQTEHCFDNVWSEHFDNFWTQPFL

PhMYB48

MVRTPSVDKNGVKRGAWTEEDNKL RAYVERFGHWNWRQLPKYAGLMRCGKSCRLRWMN  
YLRPGLKKGNYSNEEGQLIIKLHNELGNRWSAIAEKLPGRSNDNDIKNQWHSHLKKRAKTNYSY  
STLMEQMSTESSQSGSQSEQSKLSELEACDKKEVTSA AIDRLDSVPPVSLEVSSSSLLNGIMDY  
WMEEDRMFRPSMELLSIMVRTPSIDKSGMKRGSWSEEDDKLRSYVERYGHPNWRQLPRYA  
GLMRCGKSCRLRWMNYLRPGLKKGKYSHEEEQLIIKLHNQLGNRWSTIAEKLPGRSNDNDIKN  
HWHHAHLKKRSKSNNTSSAIMMKQLIECSQSESQDDEHSNSKFAEHDSFSPIDSVQPVSDDVSSSS  
VLNGMDCWFEEEDNHIFSSMEPLPDFNF SWTKPIYNFQTEPFDHYWTEAMDNFWTEPFF

PhMYB49

MVRTPCCDENGRKKGTWTPEEDRKLAA YVTKYGCWNWRQLPKYAGENFCTIYTNIAPREG  
ARCGKSCRLRWMNYLRPNVKRGNYTKEEDEIILKLHAE LGNRWSAIAAQLPGRSNDNEIKNHW  
HTSLKKRANYGPNSSSESSKKCNKNSESKRKRVENQNASHETILESSHMSPKQSIGEELCSNTTD  
YKQQDVASVIREEELYEEALAEISGNFWTEPFLD SFSNRFD FRAPSIDCGLVCPPSPFIGHELLS  
SDFD DDSNW

PhMYB50

MVQEEIIRRGPWTEQEDFQLVFYVNLFGDRRWD FLAKVSGLKRTGKSCRLRWVNYLNPGLKR  
GKMTPQEERLILELHSGYGNRWSKIARKLPGR TDNEIKNYWRTHMRKQAQDQRKNAFISPS  
FSNCSSNSSANSPAVDSIPITKQNKRNLETA EEKKIYNHEEA EENQNMVYTMDEIWKNVESSQE  
TETMSKLPVMASPIWDYCPDSLWMTDFNYFDN QDIPFFTG

PhMYB51

MCSRGHWRPHEDQKLRELVEKYGPHNWN AIAEKLQGRSGKSCRLRWFNQLDPRINRNPFT  
EEERLLSAHRIHGNRWAIARLFPGRTDNAVKNHWHVIMARKCRERSKIYAKRATAASATTIAH  
QKSTSDEQELSSLMQQDKRQISNEHTTSR FNPFVDAHQQYFFSERFAYPCNLTYNYSLYPKLLHK  
DYLFFHHAKVNQDEKQRT EYDFLQVNTDSNKSEVIDHINASARIMRDDEEVEQEAVDLHRSKS  
SRGFIDFLSVGDSI

PhMYB52

MCSRGHWRPHEDKRELVAKYGPHNWN AIAENLQGRSGKSCRLRWYNQLDPRINRSPFT  
EEERLLASHRIHGNRWAIARLFPGRTDNAVKNHWHVIMSRRCRERSKIYSMRNINNSAQNSTT  
SPQDTSQNTRRGSPNMNSIDQQLGRFNYYPNLTFNNSLYPKELYFDHLRHHLKINEDKNQEV  
ECYDFLRVNTGSNKSEVIDHIARKGT DDEEVEQEAGYHYPAQSKAPVQFIDFLSVGDSS

PhMYB53

MAEGGGSGDDTRSSCPRGHWRPAEDERLRQLVEQYGPQNWNSIAEKLQGRSGKSCRLRWFN  
QLDPRINRRPFTEDEEERLLAAHRVHGNK WALISRLFPGRTDNAVKNHWHVLMARKQREQSK  
ICGKRSYPQDNFLSDSKSPSYGFRRRNNNNNNNTNIPKTQEGYNYGTKFSLFEFQNPTKDRVFSV  
STYSSSPSWNSPDQLFRRNGSHLLKESSNFSGQSKLCQNNLSFSTHGGGGATLFPVPNNYKKT  
ARNPFSYSNNGSDGMTEKVMNISNSTFSNKILRASIEQQRRQQQQHAEEAIEKKDIPFIDFLG  
VGISS

PhMYB54

MVRTPCRDEYGRKKGTWTPEEDRKLAA YVTKNGCLNWRQLPKHAGLARCGKSCRLRWMNY  
LRPNVKRGNYTNEEDGIILKLHTQLGNRWSAIAAHLPGRSNDNDIKNHWHTSLKKRANYESSK

KYNKNRESTNTKNQASSRRKSTVENENASSLSCSMSTHETILEGSQWSLKQSSSEEISSCTADYQ  
QLDIASDIREVKVFEEEAAYVAESCGSFWTEPFVVDSSFSSRLHDCVAPSIDFELVSPSPFIGHGFISSE  
NLDDYLMLSSLFD

PhMYB55

MVRAPCCEKMGLKRGPWTSSEEDQILISFIQRYGHENWRALPRQAGLLRCGKSCRLRWINYLRP  
DIKRGNFSEEEETIEMHQVLGNRWSAIASRLPGRTDNEIKNFWHTHLKKKLEHNDLRATTTA  
KRSPHEMIPRWKIEHHISSNYQASQNIANQYPTCHDEDLQENNSTSDTQANKEESMQPTNTQI  
GHDGDASISNDM

PhMYB56

MGRSPCCDKVGLKKGPWTPPEEDQKLLAYIEEHGHGSWRALPAKAGLQRCGKSCRLRWNTNYL  
RPDIKRGKFTLQEEQTIIQLHALLGNRWSAIATHLPKRTDNEIKNYWNTHLKKRLVKMGIDPVT  
HKPKNDALLSHDGQSKNAANLSHMAQWESARLEAEARLVRQSKLRNSNFQNPLASQELFTCP  
TPSSPLHKPIVTPTKAPGSPRCLDVLKAWNGVWTKPMNDILRADGSTSATVSVNALGLDLESPT  
STLSYFENAQQISNGMIQENSTSLFEFVGNSSGSSEGGIMNEESEEDWKGFNGSSTGHLPEYKDG  
INENSMSLNSTLKDLTMPMDTTWTAESLRNAEDISHGNNFVETFTDLLLSTSGDGDGGLSGN  
GTDSDNNGGSGNDPSETCGDNKNYWNISIFNLVNSSPSDSAMF

PhMYB57

MEEVKATQVTYSSGMPVTVKLAEDNIEMRKGPWTLDEDSILIHYSLLGQGRWDSLAQFAGLK  
RSGKSCRLRWLNLYLRPNLRGGKFTPQEQLLILLHFRFGNRNDYYLCFRWAKIAEHLPGRTDN  
EVKNYWRTKVQKHANQLHCNVNSQEFRDVLRYQWLPSLAEQIRVTPSSSLHEYLMASSTA  
NKTTEVKENISPFLETGIGSTSITSPNVVSSTNSSEAEPLMDNSLWSFSSSNWCSSFEDGYYLYSS  
QDQCHSWASVAGSELVPANETLVSMGKDLASHGNISSEDTKTSYDEEVRRCIRP

PhMYB58

MGKGRAPCCDKSKVKKGPWSSEEDLRITFIQKHGHGNWRS LPKQAGLLRCGKSCRLRWINY  
LRPDVVRGNFTPQEEATIVKLHQSGFNKWSKIASYLPGRTDNEIKNVWNTHLKKRLMKKIDG  
NQAKDGRSCVSPFPSSSTSVVSHTNWSQDISTKANEVEFKDDMLAEKEPKEATKSCSPTTSYG  
SNLSNLSQVEISSPKGLDMDNWILSPKVHDIHDDGVIEIPSMESDIDFWDMLDILDPSPTTTTTTS  
NSDSKQDNQPVQCQGVSDSECQKWRLYLENELGLSQSTGANCYECTDAVTSQDKEAHPFTT

PhMYB59

MVQEEVRRGPWTEQEDLQLVFYVKLFGDRRWDFLAKVSGLKRTGKSCRLRWVNYLNPDLKR  
GKMTPQEERLVLELHAKWGNRWSRIARKIPGRTDNEIKNYWRTHMRKKAQEQRKKTCSVPSS  
SFSNCSSSSSITHEENERNFYDTGGLELLQSADGQKKVSGHEKGESMKVYSMDIWKDIELSEEN  
DTITSNKLPMANVSPLWDYCPASLWISDEEESKMFPFSEHVDDHLQVYSFDKKNRTF

PhMYB60

MGRPPCCDKIGIKKGPWTPPEEDIILVSYIQEHGPGNWRSVPTNTGNSVGFTIFYILCSSLLYYFLEY  
CYNEAISLFLKGLMRCSKSCRLRWNTNYLRPGIKRGNFTSHEEGMIIHLQALLGNKWAAIASYLP  
QRTDNDIKNYWNTHLKKKLLKKFQATGLDSQSLAPSDSNTYQFSWNFHDSKLQQNQNSSTSSS  
STLYASSTENISRLLLEGWMRSPNPSTKNIDDEILHENDQNQEVYKNCESSWLHGGRNNTIGSTS  
IPKEYYKSVISEKSACDQSGGAVEKSCTNNAPPYTYLEKWLLDESAGQVEELMELPTIFT

PhMYB61

MGRHSCCYKQKLKRLWSPEEDEKLINHITKYGHGCWSSVPKLAGLQRCGKSCRLRWINYLR  
PDLKRGTFSQEEENLIIELHAVLGNKWSQIAARLPGRTDNEIKNLWNSSIKKKLRQRGIDPNIHK  
PLSEVEIDEKELANSKNNEKASEGSSDLNFIEVHENS NLRIATEKPKPSASLV TMDRYPNGMSSA  
VPPTHEFFLNRFVTSHESSSTATCKPLDLASYLSFQQLNYGSGNIGLSMNPNTNPLLFNSNSKNSEM  
VSHHQFN SNMPNDILPSISNSILTSPVAAAACSSNIELQRNSSFDDNNAFSWGAADHCGKSEKG  
ANNIHSSSESDTEIKWSEYLHTQFLPGNTNIHSHQTSIQHLYSEKSGTQFTTEVSLSTTPWLPNQ  
QQQPSIQ TADLYNKH FQRLPDAFGQFS

PhMYB62



MTSLKSSSSSSDDDIGLRRGPWTVEEDTLLVHYISHHGEGRWNILAKRAGLKRTGKSCRLRWL  
NYLKPDVKRGNLTPQEQLLILELHSGKGNRWSKIAQYLPGRTDNEIKNYWRTRVQKQARHLKI  
DSSISECSNLIPPGDGSLNTFIKAHFPLDGESYDMDTFSPATCSFKDVLYYDQMSGENNAPGDVL  
ADSFWSMDEF

PhMYB63

MVLLAAAMKNMQEPYDKNVGLNSNKGAWSPPEEDQKLISYIMKYRIWNWNQIPKFADLKRGF  
FSMEEVETIIRMYQSLGNRWSAISKELPGRTDNEIKNFFHHTLKKQFGTKVNDHVQVKKRASC  
KKSKKAKELEMRTGETQEKPNQSLDMSSSDITFDENHNWDFTNFSETSSSEDNYCTVNSLVNQ  
EAVPIIDSMVILESNPTTSENHDLYVQDFMDETGINSNKLHNKNMGTSNKKGPWSPEEDLKLT  
SYIMKYRIWNWNQMPKFAGLSRTGKSCRLRWVNYLRPDLKRGPFMEEVETVIRMYQSLGNR  
WSAISKELPGRTDNEIKNFFHHTLKKQFGTKVNDHVQVKKRATCKKSKKAKELEMRTGETQ  
EKPNQSLDMSSSDITFDENHNWDFANFSETSSSEDNYCVNSLGAVPIIDSMVILESNPTTSEDPDFS  
VQDFRDETSINSSNVDFWLELYMAAENLA

PhMYB64

MGRHSCCYKQKLRKGLWSPEEDEKLVKHITKYGHGCWSSVPKLAGLQRCGKSCRLRWINYLR  
PDLKRGTFSQEEENLIVELHAVLGKNKWSQIAARLPGRTDNEIKNLWNSSIKKKLRQKGIDPNTH  
KPLSEVENEKASANSNKNNEKVISSEDSNDQLNFIEAHESISKHIGIATEKSSSTLSTMTNNMDRY  
PLIHETNNIVPPTHEFFTSPHDLASYFSFQQLNNYSPNSIGLSMTNSNTNNLIFNNSTNSKNSH  
DMVSDQFNSCTMATDPEEIKWSEYMQTPYLLSANHHQMSQHQDLYGDAKSEAQFITQGSNLN  
SNTTWLHQSSQSSQLQTADLYNKNFQRLPAAYGQYS

PhMYB65

MSEIIKKGPWKEEEDAVLIKHVKKYGPRDWSSIRSKGLLQRTGKSCRLRWVNKLRLPNLKNGVK  
FSAEEERTVIELQAQFGNKWARIATYLPGRTDNDVKNFWSSRQKRLAKILRNSASQPSKPQKD  
NNKEAPALQKVPSVEEPLSSPAEERSLPMSQCCSSSYMNNSDTINMVPLPELENSTSLPFEPNL  
LQFEFTPNDKNYQYIGTQTSLSFPQIPLQTDGHPGLGSQELPMKLEETDFLDFFGQLSTASDIGN  
VQVPLVPLCSGPDKSSEIVVKREMDSPLTQDSFIDDFPMDVFDLIDPLPSPSD

PhMYB66

MSKGIVMNSCSHEDEFELRRGPWTLEEDNLLIHYISSHGEGRWNALAKCAGLKRTGKSCRLR  
WLNLYLKPDIKRGNLTPQEQLLILELHSGKGNRWSKIAQHLPGRTDNEIKNYWRTRVQKQARQ  
LKVDSNSKKFVEAIKSLWMPRLLEKMEQQCSSSISSPASSSSKISIEKQSSSLPSPLINHQEPYKSHD  
NTCNYDNEKTNLEHPRIYTSSSMIQEEGYHVESFNQQPDFSSQEMSISECEMGETNWFTEDEMG  
GSLWNMDEFWQFRKLGDVDI

PhMYB67

MGHHCCSKQKVKRGLWSPEEDEKLIRYISNHGHNCWSSVPKLTGLQRCGKSCRLRWINYLRP  
DVKRGFSFEAEERTIIDVHRILGNRWAQIAKHLPGRTDNEVKNFWNSCIKKKPISQGLDPNTHN  
LLSRNSTQNNKNNASCKVKSTSVFTLETMPSSNKEVPMDMIKSSLAFLPLPHNSKTISTAAYN  
DNMNSINVPRTTNNIDFPRSSLMESTSNNYLSSLTPPGYGIINYENYCMWAVSGVERHDFGPSIN  
GHEEMRIVEQEGGQVVQLQEKVFQAEVYKINHDDQFNINGQKTYVDDANFSFESVDSALMMP  
YGIYTSVKSIDHFAWN

PhMYB68

MGRAPCCDKANVKRGPWSPEEDAKLKAYIELHGTGGNWITLPQKVGLKRCGKSCRLRWLNLY  
LRPNIKHGFEETEEEDNIICSLYISIGSRWSIIAAQLPGRTDNDIKNYWNTRLKKKLLGKQRKDRH  
HHKLEMMKENENYFASQDINAYSWPPQPLLFSVLAPTNEYQQSGSSGNRHNFYSTEVSQAQF  
DPSKFSQSSAFVNPLSGNTCNLSYYPISNGVITNSFQEYNNYISVGLDHDVLNVSNLQQVDQ  
SVIEMVNSSSTIISTTSPEISTSWHEELSPIVFPSPSVSNFEIQQEISPYFVFEEPRYLGLLKQ

PhMYB69

MTSECVDRMTSKVGVDSSAVEEASGGGNAGGGVPLKKGPWTKAEDAILVDYITRHGEGNWS  
AVRKHSGLARCGKSCRLRWANHLRPDLRKGAFTPEEERLIJELHAKMGNKWARMAAELPGRT

DNEIKNYWNTRIKRQQRAGMPMYPPDICYQAFRENKQNKELGTFSSADSHPDFSPINSFEIPAV  
EFKTLELSQQRYPPALLDIAANSSLDIPATSLLAQGLNFSCNTRSFLSTMHPSKRIRGLESWFSGL  
NDDFFQACHQFENDGSLFAESLGYSSPHTDNLSVHHPAFSGVFNGSHASLNGNSSSEPKWAK  
KLELPSLQTQMASWGSPLPSLESYDTLIQLPPSEHIDSGSLSPGNSGLLDVLYESQAFRASKN  
NLHQETCDVDDSCPDVQATWGTHSGPNSPLGHSAASVFSEYTPIFGGSLEHPRSVASLFGEN  
GCKIKQEDVDLAPTDRNNDVSNHQIFAWTESCFAPTVLVPQQNRVLCLTLLPFVSPSESWAQT  
LLDFPPPLLQSSSQPATILRSSD

PhMYB70

MDIITKKKGKHIDRVKGPWSPEEDELTLQLVNHKGPRNWSLISKIPGRSGKSCRLRWCNQLSPQ  
VEHRAFTIEEDETIIRAHARFGNKWATIARLLNGRTDNAIKNHNSTLKRKCSSLSADEGNQL  
ADQIFQNDNQPLKRSVSAGSALPVSGFNFSPGSPSGSDSDSSFHVSSSSQCCVFKVPVPRTAGVL  
PPGLACPMDTSSSPEAGDPPTLLSLALPGVDSAEHSAESTQVKALLLPQATQIPPPPPPLQAVPIQ  
HGEQQDKVFVPFSQELLGVMQEMIKTEVRNYMMGIEQHHPQQQRQQQQQQQQYHQQQNH  
QLPNGIGLGLCIQQATDGRNTAANRI

PhMYB71

MLCQLMSSEQMGSWGVIEEGWRKGPWTAEDKLLIEYVKLHGEGRWNSVARLAGLKRNGKS  
CRLRWVNYLRPDLKRGQITPHEERIILELHARWGNRWSTIARSLPGRTDNEIKNYWRTHFKKK  
AKNSSANSEKSRARLWKRRQFQQQLQQQQQQQQQQQINDHIDIKKMMSLFDQENENKGQLMPQ  
GKQEMAMLYPNTTNQQEQVGLFYSMNLGCASVSLPEPSSNEDTMWDGLWNLDIFYGHFINT  
STTYNKATPCLQTMATIPPAFY

PhMYB72

MAEQMGNWGVIEDEWRKGPWTAEDRLLIEYVNLHGEGRWNSVARLAGLKRNGKSCRLRW  
VNYLRPDLKRGQITPYEERIILELHAIWGNRWSTIARSLPGRTDNEIKNYWRTHFKKKVKKSID  
NSEKTKARLLKKQQFQQHQEQQLKNQIYMKKVMSLLEGNYENEVPILPQRKQEMDFMYQNT  
TEQEQGGGFFYSMLNGYATVPVPEVSSNEDMIMWDHGLWNLEDVNANFNNTAAYNKTLPCLO  
PLATPFY

PhMYB73

MGRAPCCDKENVKRGPWSPPEEDATLKSIEKHGIGGNWIALPQKAGLRRCGKSCRLRWLNYL  
RPNIKHGEFSDEEDRIICSLYANIGSRWSIIAAQLPGRTDNDIKNYWNTKLKKKLMALDLSSQQI  
SPNYQSTPTYHSSISALQSSSHNSSLYSSPSPSLKSTAYKYTNSHFYPISTATNFPNETIISPSSKF  
LNSPSYMYNGVEEKQSNSKFLITNGNDYAEKKPKGKGICYDGENSLECSLEEIKKLITTSIHNN  
FNNFFSDENKIEEQVMMSTDVDHN

PhMYB74

MGRSPCCDKNGLKKGPWTPEEDHKLIQYIQVHGPGNWRNLPKNAGLQRCGKSCRLRWNTY  
LRPDIRRGFRSFEEEEETIIQLHSVLGNKTDNEIKNYWNTHIRKRLRMGIDPVTHSPRLDFDLSS  
LLNSTQLNLSSLLGLQALVNPEILKLANTLFLPHSENQELLLLKLQENQLLNPQHIQNSEGPEM  
LLQKLLQSQLVNSPLHNQSSIFQHNTNQIHNOIPEIPNCTQQNVSCSSQSMQGNMGRYLMNG  
QIFQENMMLPPQNYSHSTPDASENSTFQSLNNSNQNSQNFSDTPLSGTEEEKESYCSNFMK  
FEIPESLDFDDL

PhMYB75

MGRTPCCDKNGLKKGPWTAEDQKLIDYIQKHGSGNWRTL PKNAGLQRCGKSCRLRWSNYL  
RPDIKRGKFSFEEEEETIIQLHSILGNKWSAIAARLPGRTDNEIKNYWNTNIRKLLRMGIDPVTH  
SPRLDLLDLTSIFNPSLYNP SHMNNMSKLLGVQPLLNPEILRLATSLSSQRQONQNFLPSNFQE  
NQCDSQVQONQMTFPVQASQIQIPIQNISICTPLSTPCVPFSSEAQVMQQPNMEQFSPNLSYFSA  
QNCQQNEWQLNNGIASKMNEHNFP SQNYVFSTLSTPSSSPASFNSNSTCINSSSTTSEGERESYS  
SSMLNFDIPNIFDVNEFL

PhMYB76

MEGTTGDKIKGSWSPEEDNMLIKLVDQHGPRNWSLISTGIPGRSGKSCRLRWCNQLSPTVQHR

PFTPSEDAIIQLAHALHGNRWATIAARLLPGRTDNAIKNHWNSTLRRKRHGPPLSRSGSSSDQSN  
SKRHCTRASQEQSSCGLDCDDLGLDGPNGLDGDELGLYGPETSLTSLPGGGSIDSPMKEDVPV  
KESEPLMNSDNKVKEEKRTVEIEETCLVTIMQRMIAHEVRCYIDKLRAQGGLGIGPGVEFEVFK  
NP

PhMYB77

MENFNRCSTSTSSSESSSESSLNKAERIKGPWSAEEDKILTKLVERYGARNWSLISKYIKGRSGK  
SCRLRWCNQLSPNVQHRPFSHAEDETILAAHAKYGNRWATIAARLLPGRTDNAVKNHWNSTL  
KRRYQQQKNHNTVIFPDMKNGSGSGSGSGSGSRSGSGSCMDYLNVDSPRGTVKVVVNNC  
NSEYDDPMTESLAPPGMGDELPERKTESFSAGFWDVMDVIAKEVREYVASSFNGASTGFP

PhMYB78

MDHHHKTGVGLGRRGEDYRTSNVMNQENIREEDIMDLRRGPWTVEEDFTLINFIAHHGEGR  
WNSLARCAGKSCRLRWLNYPDVRGNITLEEQLLILELHSRWGNRWSKIAQHLPGRTDNEI  
KNYWRTRVQKHAKQLKCDVNSKQFKDTMKYLMWMPRLVERIQAAATTAATSTTTTNTYIQNLE  
NQQSVPNMMSHMSQFLPIQLENHKKTNSINHSSMTLTLENSSTTTSSDNSIGRQVSPTSDLTDCYY  
NFSINQSSNNQDYTPFNQNYGESLISATGYFPQAVDQQNSQWMDSEYVSDNSWNIEDMWFLQ  
QQLNNNL

PhMYB79

MGRSPITSDKSGLKGPWTPPEEDLKLIQYIEVHGPGNWRSLPKNAGLQRCGKSCRLRWNTNYLR  
PDIKRGRFSFEEEEETIIQLHSVLGNKWSAIAARLPGRTDNEIKNYWNTHIRKRLLRMGIDPVTHS  
PRLDLLDSSLFNSTQLNLSSLLGLQALVNPQFLRLATTLTSTHTENNQEMLLQRLQANPTV

PhMYB80

MEGSSSTCSSSESSLASGTPKTPRDGNNNKPERIKGPWSAEEDKILTRFVERYGAKNWSLISKY  
IKGRSGKSCRLRWCNQLSPEVEHRPFSPAEDDTILAAHAKYGNRWATIAARLLHGRTDNAVKNH  
WNSTLKRRQQIRNNVSVVESPIIIIRNDIIVNVNNWDEVDPMTTSLAPPGCRRRVCRWSFG

PhMYB81

MGRTPCCEKNGLKKGPWTQEEDQKLIDYIQKHGYGNWRVLPKSAGLQRCGKSCRLRWNTNYLR  
RPDIKRGRFSFEEEEETIIQLHSILGNKWSAIAARLPGRTDNEIKNYWNTHIRKRLLRMGIDPVTH  
TPRLDLEFSSILNPSLYNSSQLKVSRLGQPLVNPEVLRILANSLSSQYTVKPSELVDQNLLMS  
RNLQGNQLSNPQAQNLPLVQDISCGPCSNEAQLMQQANLEQFSSNMSNYSSQNCQLNDW  
QNQEMPSHLTEDYNYHLHNYGYQQDQSIMDPPPSDASAFQSNDSNVSYQSILSTPSSSPTPLN  
SNSSYINSTTTEDERESYCSNTFNFDIQNMLDANALL

PhMYB82

MKDKEVKARMKRGFWKPEEDLILKNCVETHGEGNWATISEKSGLMRSGKSCRLRWKNYLRP  
NIKRGMMESEDEKDLIIRLHKLLGNRWSLIAGRLPGRTDNEVKNFWNTHLNKRSCKGKKKH  
KAEEANHQRKNDREYPAETARNQEVATKTVLDSWIEEMQDFNCSLLSPLPMNSVAFLQDEPFF  
PILDDIVLLEAFTSTGKEVWPDIQPFL

PhMYB83

MRKPEHGSVMKEKGNNNNKAKLRKGLWSPEEDEKLMNYMLTNGQGCWSDIARNAGLQRC  
GKSCRLRWINYLRPDLKRGAFSPQEEELIVHLHSILGNRWSQIAARLPGRTDNEIKNFWNSTIK  
KRLKNNNNNNNNNNSSNNNTSPNTSDSSDLRVLMGGSIFPMQGHVNVNVMAGLCMDNSS  
STTSASSLQAIVPNNHFNPFQLDSTNYDIIAGAAGLYNLPPCLGQFGSSSGHDGGVVDYGVVEA  
YSSMGLGSDFSVPPLESNGKGTMGENSIVNFSSNVSAVNDYSLFDKKTNGNNQQLMSSSDQ  
SLKVEDYMGVFGNSHHHHWHGESLRIGFDWEGLLANVSSLPYLDQVE

PhMYB84

MGRAPCCDKNGLKKGPWTPPEEDQKLIDYIKEHGYGNWRTL PKNAGLQRCGKSCRLRWNTNYLR  
RPDIKRGRFSFEEEEETIIQLHSVLGNKWSAIAARLPGRTDNEIKNYWNTHIRKRLLRMGIDPVTH  
SPRLDLLDISSILNYPALYNSSHHQVNFSRLLGHVQPLVNPEVLRRLATSLSSQRQNSNFLMPN  
NVQENQICISQVQNVHPMVQVTSQVQNPIQNIPTCTTSLITPSVPFYDEARLMEQFSSNLVNSS

SQNCQVNEWQSSGMASNLTDQDYFNNPLQNYGYHIELDQSIRDPPPLSDASTFQSNDSNNFSF  
QSVLSNLSTPSSSPTPLNSNSTTTEDERDNSYCSNMLNFDNIPNIWDSTNEFM

PhMYB85

MGRSPCCDKNGLKKGPWTPEEDLKLIQYIQVHGPGNWRTL PKNAGLQRCGKSCRLRWNTNYL  
RPDIKRGFRSFDEEETIIQLHSVLGNKWSAIAARLPGRTDNEIKNYWNTHIRKRLLRNGIDPVTH  
SPRLDLLDLSSLLNSTQFNLSSLLGLQALVNPEVFRLATTLASHNNENPELLLQKLQENQLLNT  
QLQQNQLLNTQLGNHLQVFQPN SQFNQIQEIPTFTPSNVPCSSSQPMQLGPVELSYLMNGQ  
MLPPQYGYCASNVSDSSNLQSLNNSNNQNSSNFSLDVSLSTPLSSTEDEKESYCSNLMKFEIPAS  
LNFDDFM

PhMYB86

MGRHSSFVKEKLRKGLWSPEEDEKLYNYITKFGVGCWSSVPKLAGLQRCGKSCRLRWINYLRP  
DLKRGMF SQEEEDMIISLHQVLGNRTDNEIKNFWSYLLKKLIKQGIDPNTHQPLSENQVRNE  
TDCKDKASTSTQIQQPFNL SKRNFNYEASRQLTEASKDQLVSKQVFDPLFLYEFQANVNPSGYN  
LRPYDHNQNQIEGNTNFGFFSMPSLTNFEQGHMTETDFSESSSRMSLLYISEAKESSNSSNMIS  
HHNAAGIQMNEMLENSQALSWDVDNKIDSLFQYPYDGIKNEEDFNNPLSSLEDLSGENLDV  
FHQI

PhMYB87

MDHQHAKVDLRSKEAACSTNNIIQKVEEDDMDFKRGSWTVEEDFTLINHIALHGEGRWNSL  
ARSSGLKRTGKSCRLRWLN YLRPDVRRGNITLEEQLLILELHSRWGNRWSKIAQHLPGRTDNEI  
KNYWRTRVQKHAKQLKCDVNSKQFKDTRLRYLWMPRLVERIQASNSSKNQVIQQTSTNNNISN  
NIIPMSFTQENSSTTTSSENSLGTQVISQVSDTSDCCYNYSTINQSDTLCYGESLTSPTGYFHQEG  
ALDFRTVDIDDNQQTNQFLDVSDNLWNIEDMWFLQEQLN

PhMYB88

MQNLKKSGNSSGDVAAAKPKERHIVSWSQEEDDILREQIRIHGTDNWTIIASKFKDKTTTRQCRR  
RWFTYLN SDFKGGWSPEEDMLLCEAQKIFGNRWTEIAKV VSGRTDNAVKNRFTTLCKKRAK  
HEALAKENSNSFINLNNKRVIFPDGLSIDKITEAAAPIKKLRMSGVSDVPQDGS SKGNSFGDCG  
TTHPLL RHPFAVLAQNFHNAAGNLASHQQVNNMKESTENATDSKTQGTFLKKDDPKIHALM  
QQAELLSSLAMKVNTENTDQSL ENAWKILQDFLHQTKEGDMLKFQLPEMNIDLDDYKDLMA  
DSRSSNEGSRPSWRQPALSEDSAGSSEYSTGSTLLSHALADKTEESQAEGCAHLQDIESELRSQ  
MSDQGGIHESENGTSCRVSTTPDTLPVCDEEKANNGPATAECEFLNTDFSSPLQVTPLFRSLAET  
IPTPKFSESERQFLKTLGMESITPHPGTNLSQPPSCKRALLHSL

PhMYB89

MDHHHHVKVGSSHGGGAN CNKNNQQQHDEDMDLRRGPWTVEEDFALMNYIAHHGEGR  
WNSLARCAGLKRTGKSCRLRWLN YLRPDVRRGNITLEEQLLILELHSRWGNRWSKIAQHLPGR  
TDNEIKNYWRTRVQKHAKQLKCDVNSKQFKDTMRYLWMPRLVERIQAAAANNTTNSNNPS  
KSQMVHQ TINSNMSGMSEFVPIHDNVVSTNKPRLMSTENSSTA AASSENSFGTQVSPVNSDLT  
DCCYNYPPVNQDYFQVSHHQSTTNDQLCHGESLTSPTGYFHHGTGLDQFQGM DQQQNMN  
SSQWMDGGNNFSDSLWNIDDMWFLQQQLNNNNNNIV

PhMYB90

MGRSPCCTNNNLNKGAWTK EDEILGNYVKIHGA AKWNILCKKAGLNRCGKSCRLRWNTNYL  
RPDIKRGNFSEEDSLIINLHSSLGNKWSKIASQLPGRTDNEIKNHWNTKLRKKLNKLGIEPQT  
HKQIPNFNLFNSLQMPPLFSQQDVTQLAKLQLLHFQTLLQTINAITTTFPSNPLMPNINYPMQD  
DVNGILNFSMPNFEEDDNLKGPWTEDEDEKLIDYIKQNGHTNWQSLARKAGLNRCGKSC  
RLRWNNYL RPDIKRGFRSP EEEEEIIINLHSDLG NKWSKIAAHLPGRTDNEIKNFYNTHLRKKLLR  
LGIDPKTHKPISKLSLVNLSHHLTSNSNYFLSLASVLSLQAQFSLLAKIQQVIQSPLPTINTINLL  
SSIQGNILSNSSPQLES LRNETEMSKFLDSSLANTTTTTPCLDNTNL

PhMYB91

MRERQRWRSEEDALLRAYVRQYGPKEWHLV SQRMNTPLNRDAKSCLERWKNYLKPGIKKGSL

TEDEQRLVIQLQAKHGNKWKKIAAEVPGRTAKRLGKWWVEVFKEKQQREHKENNKVVDPVD  
EGKYDHILETFAEKIVKERSVPGLLMATSNGGYLHADAPAPSPQALLPPWLSNST

PhMYB92

MGRSPCCDETGLKKGPWTPEEDQKLINYIKKHGHGSWRALPKLAGLNRCGKSCRLRWTNYLR  
PDIKRGKFSQEEEQTILNLHAILGNKWSAIATHLPGRTDNEIKNFWNTHLKKKLIQMGYDPM  
HRPRTDIFNSLPHLIALANLKELVEQSEVARIKYLQYLLQPSMAANLANSMSTSNTCSVANISD  
MEAYNNLLNIGTNHLENSTNNIPPPSTTLQAIQDSITFSHLPQLATPNCNFQNSLNEENMVQT  
HVISQGENTPTSPWQLPSSLSPENDNQPINSYINNIGGSCNPPFFGGAHPSVWPEILLEDRLFQ  
DIA

PhMYB93

MGRSPCCDENGLKKGPWTPEEDKKLVYIDKHGHGSWRALPKLAGLNRCGKSCRLRWTNYL  
RPDIKRGKFSEEEEQTILHLHSILGNKWSAIATHLPGRTDNEIKNFWNTHLKKKLIQMGYDPM  
HRPRTDLFASLPNIIALASLLQHHPLEDHAVRLQAEAAQVAKLQYLQWLFQSSSSSSNNYPIATS  
LNTTQYSNLEDFGPFNLSNSTKESTPSINLSLENQALFSNENSGSQLLHNPDTSLPLTDTQEV  
PFNFQAHLNNNNNSNNTSGDNGQDFNFEICSPSSPLHNIIPSPSSRLPPLTEISISNNQGDAS  
TNSNAAEGTSSYWPELFFEDHFMHEIA

PhMYB94

MGRPPCCDKVGKGPWTPEEDIMLVSYVQEHGPGNWRAVPTKTGLRRCGKSCRLRWTNYL  
RPGIKRGNFTDQEEKMIIQLQALLGNKWAAIASYLPERTDNDIKNYWNTHLKKKLLKQETG  
DDLFSRENGYFSSSNSTSKGQWERTLQADINMAKQALHNALTLENLSSCVKQESQVSTYAS  
STE NIARLLKGWMGSSTNNSDYKTSNNVATADSSSCDGTSPAEEIGLMESFKSLFGFESFESS  
SSD QFSQTASPDASKLKGEIKKEANEQMPLSVMLLENWLLDENTIQQKDDLNSNFSFDETND  
LF

PhMYB95

MGRPPCCDKIGVKKGPWTPEEDIILVSYIQEHGPGNWRAVPTNTGLLRRCGKSCRLRWT  
NYLRP GIKRGNFTEHEEKMIHLQALLGNRWAAIASYLPQRTDNDIKNYWNTHLQKKLKLQGH  
DD QNNQKGKQSISKGQWERRLQTDIHTAKQALVDALSLDKTTNVVSPNINSSANSLPVGQT  
SS YASSAENISRLQNWMKNSPKSSQTTSNSTTSQSSFNLSMVSSSSPSEVTMSATTPEGLD  
SLFSF NSSYNNSDVQSMLTDEVVAGIFQDGSKQNWQNFKDESGIFQKGSQNMETQVPLTL  
LENWL FDDANAQTQEELMGIGVGMWEP

PhMYB96

MGRPPCCDKIGVKKGPWTPEEDIILVSYIQQHGPNGWRAVPTNTGLLRRCGKSCRLRWT  
NYLRP GIKRGNFTEHEEKMIHLQALLGNRWAAIASYLPQRTDNDIKNYWNTHLRKKLKLQ  
GNDDE NSSSTSQEGISSNISKGKWERRLQTDIHMAKKALCEALSLDKPIANPTQTPVQESV  
QPCTTYASS AENISRLQNWMKNSPKSSQLSQSNSESTTTQSSYNNFMSMGQVGSSSPSE  
GTISVATPEGFDSL FSNSSSVDEGNAAIFQVDSKPNLPNLNAANGFFLEESKPTLESQVPL  
TLLEKWLFD DAINAPA QEELMGIGMGMALGEAADLF

PhMYB97

MEGRPPSSSYHHYRYHFHHEDELGEIKKGPWKAEEGEVLLNHVKKYGPRDWSSIRSKGL  
LQRT GKSCRLYWVNKLRPNLKNGVKFSAEEERTVIELQAQFGNKWARIATHLHGRTDNDAP  
KFSSSA DQEEFLSKSQSCSSSYIDNSNMIYLVPLNPNSTDFEANLLQLDFTANEKKLKID  
SHIQLPFTKLQN DFALPLQTHEFMPNFIDVFGQQLNGSELDNVQVPFVSTCSGPD  
RSCFENPSSPDSFIDDFPLDM FDHIEPLPSQSE

PhMYB98

MEFDHSSNQNLSQLPYNNSLIRGEMDDVFCTVSKDYLLQDFHHLDTFNPHDNLLIETNGYD  
SLFDPIILNEGNLSSLDHQDFNLNYEFKPFQNSASGSTLVMKNFENSMDMHTSNDENLLSLC  
SE DMKPLSFVNVQDESSCITADNNYYDNKICRRKKNKKVSSKENILSPCMGKLGKGGKKS  
SAKG QWTTEEDRLLIHLVEKFGVRKWSQIAQMLKGRIGKQCRERWYNHLRPDIKKDLWTE  
DEDRLI EAHAEVGNKWTEIAKRLPGRTENSIKNHWNATKRRQFSRRKCRKTKWARPSCLLQ  
NYIKSLNFE

KSIRSSHDTTINAPKQEPFGNIPDYDLTSEVPEFAFDDKLFDENINMDALMDQIHDRCLDLEIPY  
DELPKLMQGDANKEPDSIDLISEI

PhMYB99

MSEQMDSWGMTKQGWRKGPWTSEEDRLLIEYVNLHGEGRWNSVARVAGLKRNGKSCRLRW  
VNYLRPDLKKGQITPHEEKLILELHARYGNRWSTIARNLPGRTDNEIKNYWRTHFKKKTKNSR  
DKSEKSKVRLVKRQQWQQQKQQQKLNTQTDSNRVVSLLNNKKNYYASILNKLGNKIVSLLDK  
NENRILPLVTQKENQEMANLYSNTADQEEDDFLNSILNDYTCVSLLESSFNEDMMWDDFWNN  
LDEYQCNVSTTI

PhMYB100

MAPDDRGMKNGGASTGRSNGAGSSRQVLKKGPWTA AEDSILMEYVKKHGEKNWNAVQRN  
SGLMRCKGKSCRLRWANHLRPNLKKGAFTVEEERIII ELHAKLGNKWARM AQLPGRTDNEIK  
NYWNTRLKRRQRA GLPIYPQELQQQNQHENNNQPHSLLSSSYDPQNSTNYNSP SLSLLDIFNP  
STMKPSITQQFPINTPSLCLPSTNNNNIFRNTPKGLSLTLPSSMRNSQFSSLPNNNFTQGLSSNSIQ  
VPPFQHNYPNPNINRPFTGISSNPNGLICGMGIN TINYP SGQSSMPVTASSSENTGSDFGSSDNA  
NNYANTNGLSRGNSGLLEDLLEESQTLNRP GMKIEDNFLDLKEDQEADYK GKSM LWEDYGLV  
EDAE EAILTEESAYSFAHGVDHVAQNKNSESSSPHSPNSSSGIFMKKEDSFHGTNQADDDIMC  
LLDNFPLAVPVPEWYEDEDDKNNCNGQSSNVTNCDHIAENQAEDSKSPALTLNSGTRNHDW  
EFGGCCWNNMP SFC

PhMYB101

MAPNGGGVKTSLARNISHGGTRHVLKKGPWTA AEDAILMEYVKKHGEKNWNAVQRNSGLM  
RCGKSCRLRWANHLRPNLKKGA FSL EERLIVELHAKLGNKWAHNEIKNYWNTRLKRRQRA  
GLPIYPQDIQPQNQHEHNISLFDHPQNSNFINPPLSLLDIFNPSTMKPSVNSQQYQFNNPSPFL  
TNTNNNNNNHFKLFHDPRVSLSLTLASSIRNSQLSSLVAPVPKTF SQGLTSMQVPPLQHNYPSFS  
TNTRPYTAISTNPNGLILGMGIETTTCSRSTGNDYMKATSSSDADNYNVVDPGLSRGNSGLLED  
LLEESQTLTRAEKIEENCLVDENEASQGKLVWEEYGLTEESTYSFAHGGDDTTPNSSSGITTKDA  
SLELANQVDDDIMRFLDNFPVAVPAPDWCD DENEQNNTCNGHYFEPRDQMD

PhMYB102

MKTCAVRDSDEKDKGMGHCCSKQKVKRGLWSPEEDEKLVRHITTHGHGCWSSVPKLAGLQ  
RCGKSCRLRWINYLRLPD LRRGSFTEQEERTIIDVHRILGNRWAQIAKHLPGRTDNEVKNFWNSC  
IKKKLIAQGLDPNTHNLLSTHQNKNNKTNNSSKTSYHQDSTSVFTIDTSTNKEVISMDIKATL  
AALPPFLHSNNNTSSTYHYTTPIVPIIEYQNPSTFTLSENNNGSTTTQHSVLDFASNTSINSTTN  
NVSSSTLTPLFEGYINENCMWAGTGLEPTTLNPATGGTEEMQVQLQGEQFPIQTKFCDQEDVY  
KVNQTVENTFDNSNFD FDFVDSALVPCGLYSVNSMDQLSWDC

PhMYB103

MGHHSCCNQQKVKRGLWSPEEDEKLIRYITTHGYGCWSEVPEKAGLQRCGKSCRLRWINYL  
PDIRRGRFSPEEEKLIISLHGAVGNRWAHIA SHLPGRTDNEIKNYWNSWIKKKLKKPSKPSTNTT  
SCTEHQQQQR SQFSYNTTSQPEILFTQDLGVTKSQILQDSALFTSPNPLFYFDNGNSLETMTNN  
VNDRSTNASL FQETSVLNSEFWQVDLQQQVHTSYTTGIHSNYLPPLLEMPHMEIPSSNNNMM  
VEGQDHHQLNEWNMMDTQQCCPSYLFWDQETGTLGGDHEFVDPNNTSNNIGQILSSFPSSL

PhMYB104

MGRIPCCEKENVKRGQWTPEEDHKLSSYIAQHGTRNWRLIPKHAGLQRCGKSCRLRWTNYL  
PDLKHGQFSEAE EQTIVTLH SVLGNRW SVIAAQLPGRTDNDVKNHWNTKLKKKLSGMGIDPV  
THKPFSHLISEIATNLAPPQVPHLAE AALGCFKDEMLHLLTKKRIGFQFQQFGTSTAPSTSTVKV  
EDNKEETIEKIKYGLSRAIKESDMLPSNKHWDPSGGARSTNLAEPSSGFPHVSDGGFQYNFASL  
LHEDAAEGSPWNQSLCTGSTCTVGEQQQVHQLHKKLNSNDNCGEDNSDGAKETRNGSTTM  
FHSDCILWDISSDLLNPMV

PhMYB105

MRLLRFCVLASCDFQEMNFLTQNSLVMDY NKGRHCLSNGSTDGKVLENPWIFHSMVEDENG

TKLNVETEEVDLVGRKNNGGTKLCARGHWRPHEDAKLKELVAQYGPQNWNLIAEKLGRSG  
KSCRLRWFNQLDPRINRRAFSEEEEEERLLTAHKMYGNKWAMIARLFPGRTDNAVKNHWHVI  
MARKHREQNSVYRRRKPSNMQQFHSMGFPHVSGSDNAIQSNNLNSDSTISSTTNNMDEHCAS  
TCTDLSLTPSSSKVIFMKRLTHMQHHHHPLLEASKGFSRDAQEVKMESGVHPKFLHGKEPRAD  
TVDASHQYGC GGSDTNSDISASESVANNMTNVKMYGQNHENVKLVEKQMKSKTMPAFIDFL  
GVGAT

PhMYB106

MTSYSCSPMGTTTTTTSMGMFYADMNSLSITSINYVTSDGGVGENSNETIDLNASCCFNEEKQIT  
MHSNFFSSGNGKEIESGQSKLCARGHWRPAEDAKLKELVAIYGPQNWNLIADKLRFNQLDP  
RINRRAFTEEEEEERLMAAHRLYGNKWAMIARLFPGRTDNAVKNHWHVIMARKYREQSSAYRR  
RKMGGQFVYRRTTTTSLVEEEDSSFVSSNSSSGKEVVAATMKGENPTPIISGQTAANPFASLKINND  
GPSGWVVYGPNGSSHMAASAGEAAPPSTNVIVGMK

PhMYB107

MARTRCYDKSGLKKGTWTPPEEDRKLAAVTRYGCWNWRQLPKFAGLARCGKSCRLRWLNLYL  
QPNIKRGNYTKEEDQIIMMLHAEIGNKWSAIAAHLPGRSDSEIKNHWHTSLKKRSTQEESTSST  
NSKKRSPINSKYISSSRKKRSGSGNQISVKS NVPQLSPKQSCSEVSSCASIHVESMHVESEGYQEEY  
LFEESSGISFWTEPFLVDNSSTTNDFFVPSELDHGLVSPFSPVISFDEFICSYD

PhMYB108

MGRTRCYDKSGLKKGTWTPPEEDRKLTA VTRYGSWNWRQLPKFAGLSRCGKSCRLRWLNLYLQ  
PNIRRGNYTKEEDEMIMKLHAEIGNKWSVIAAHLPGRSDNEVKNHWHTSLKKRSTQEESTSST  
GSERRSNNSKYISSSRNKRRENGTQISANSNIPQLSPKQSCSELSSCASVDQHVENMHAEREVFQ  
EEYLFEESSLISFWTEPFIVDNFSTTSDFVTSQTDGGLVSPFSPFTRVIWVIFQFCAYHPWHLDT  
PDKRDISLAALVVSKSKSLVESFDTKLKENMMNDEPKKLIELSVLKMKKLRNHCRPCARAVDP  
RERSERNNGGRLEKRRAPVMNRQSNRWPPHA

PhMYB109

MEEAEQQSDFKLIDAAVNGGDTMAVDENNGGGGGGGKVKGPWSQDEDTVLSLVSKFGAR  
NWSLIARGIPGRSGKSCRLRWCNQLDPSVKRKPFTEEEEDNIIIQAHAVHGNRWASIAKLLPGRT  
DNAIKNHNWSTLRRRFAGLKRVPNSHFEMLDSSNIDRVKATSEETRSGDDHNQKSLEGREAS  
VQQCKRTLLEDRAPVSEMFVPEKVAHLVSGSCHSTINENNPSVSRPTAKVGAFDVHNLSSASF  
ASSRTVPIQGNLLQAFSPDFGICKLLEGLPDEPIIPSSCGHGCCSAHSKSSSASSLLGPEFVEYEDLP  
AVSSHSELFAMATDLNNAIAWIKSGLENAGKLPDKTTSGRDHQGSSTSTPMPMPMTSFVLPAQVE  
SLS

PhMYB110

MVRAPCCEKVGIKRGRWTAEEDELLLYIQANGECSWRSLPKNAGLLRCGKSCRLRWTNLYLR  
PNLKRKGFTSEEDETIFKLQCSLGNRWSLMASYLPGRTDNEIKNYWNSHLRRRIYTFGMKKKPI  
KTAAEMPNTIVADGLNCESLKKRGRVSRSAKKYNNNTTTTTTAYISTLKPSSGVGAGGGAI  
CSEGDSIVDAGIGLDIQQHDEDHAGSAIGKPRNEETEGTNQKHINATAEKQEVNRGILSFEEQG  
QQVLDEHILIGPHEKNVGD ETVHLQQPNYCLHDFGNQVSLSGVLEVDEESHENWWSTMNSD  
NFLEDELWVDQCSSLDFEGSIEECDDISLPLVAYSLVELLGPCVLVAIGKIWESVGCSPSGSRKFSS  
LLRLGYVQGWAVKLMHCKRKDDDDGDGDDDEDSSCISTVEFSFSTKEGFVKFRTNFCGCFG  
GMFCSKVSIS

PhMYB111

MGRAPCCEKVGILKGRWTAEEDETLTNYILTNGEGSWRSLPKNAGLLRCGKSCRLRWINYLR  
DLKRGNITSEENIIIKLHATLGNRWSLIAGHLPGRTDNEIKNYWNSHL SRKVESLRIP SDEKL PQ  
AVVDLARKGALKQIKRKVGRTSRSTMMNRKSKNSAVSSLSMPKQLKESSEPLNATVPIMPSTP  
NLEKEALSRTSTISSWLDGNNAMDSMQKEVANIAAPNPLMESREAHSSLS SDGMEWLEEIMPL  
VIDDQDMDPNFIFTCLENGQGESAVKVTEEADNNFLNTSKINERDNNNRESSEAAVSINIHDE  
QVHEKSNETSSLMKDEGTFDQWDWKEITHDGGKGWPWDDNNSLQLWDTTTTDDTGFFQNCI

NEATVEMDSVHFENQKHSALVAWLLS

PhMYB112

MEGGSGDGSAYQPYQNIPTNLSIFQQGPPLIAINRYLLSHQSQFSSQQSVNNQSIFSQCGLCD  
FSSYSGISHANGISWSSVPEPSFVDRIFLSHEQNGLHWNNQENGIAEEMISSQQNSKEAGKKAK  
EGPSSTTVLVKGQWTEEDRKLVKLVKQFGMRRWAQIAENMVGRAGKQCRERWHNHLRPDI  
KKDAWSEQEELILVEAHQQIGNKWAEIAKKIPGRTENSIKNHWNATKRRQHSSRRNKFKKQEK  
DGQNDISKYRSNLRDYIRSKYFSDNSPPTASTPSNSISTNATPPYSDDDSPSLLTRQTYDEEMNFM  
QNLFGENSLVENNGKVAEAMEAKTRQCPFDNKSSSSSCPFNSLVAGYTKSDNQIVNDNSEYGY  
NMYMADHYSKVTQQSDSDQCSGIYLSYLLDHSTANSPLPCSGSIGYGNMNAGTLVNQGSSSSK  
GNKEVDLMEIVSSTLYRQQTSHTTFFN

PhMYB113

MVGMMGWGANSQQEWKGPWTPPEEDKLLSEYVNLHGEGRWSSVSRACAGLNRTGKSCRLR  
WVNYLRPGLKRGHITPQEEGIIELHALWGNKWSTIARYLPGRTDNEIKNYWRTHFKKKEKASS  
KQDKRKTLRQRINNQPQLQHDTNYKFSPQPEEVIMQNSDEINEHNDTLTFTYHPNMENTIVDL  
PPVRTSSDISYIWTDNFVMDGLWGGLWNLDVDDHSQPASDKCKVAIQNQPTDYQ
